# Supplementary material for: Solar-driven electrochemical NH3 splitting into H2 and N2 on BiVO4-based photoanodes
Source: Royal Society of Chemistry journal article supplement (doi:10.1039/d3se01513k), 2023-12-13
Supplement: d3se01513k1.pdf [file d3se01513k1.pdf]

Supporting Information for

## Solar-driven electrochemical NH<sub>3</sub> splitting into H<sub>2</sub> and N<sub>2</sub>

Miwako Teranishi,<sup>a</sup> Shin-ichi Naya<sup>a\*</sup> and Hiroaki Tada<sup>b\*</sup>

<sup>a</sup> Environmental Research Laboratory, Kindai University, 3-4-1, Kowakae, Higashi-Osaka, Osaka 577-8502, Japan.

<sup>b</sup> Institutes of Innovation for Future Society, Nagoya University, Furo-cho, Chikusa-ku, Nagoya, Aichi 464-8603, Japan.

E-mail: shinichi.naya@itp.kindai.ac.jp, hiroaki.tada@mirai.nagoya-u.ac.jp

### Table of Contents

|                                                                                                                                                                       |    |
|-----------------------------------------------------------------------------------------------------------------------------------------------------------------------|----|
| <b>Materials</b> .....                                                                                                                                                | S2 |
| <b>Fig. S1.</b> SEM image and EDS-elemental mapping of the cross-section of BiVO <sub>4</sub> /FTO. ....                                                              | S3 |
| <b>Fig. S2.</b> Tauc plots for BiVO <sub>4</sub> /FTO samples. ....                                                                                                   | S3 |
| <b>Fig. S3.</b> Dark current-potential curves for several electrodes in NH <sub>3</sub> aq. ....                                                                      | S4 |
| <b>Fig. S4.</b> (A) Cross-sectional SEM images of SnO <sub>2</sub> /FTO and FTO. (B) Film thickness distribution of SnO <sub>2</sub> /FTO and FTO. ....               | S4 |
| <b>Fig. S5.</b> CVs of FTO and SnO <sub>2</sub> /FTO electrodes for the [Fe(CN) <sub>6</sub> ] <sup>3-</sup> /Fe(CN) <sub>6</sub> <sup>4-</sup> redox reactions. .... | S5 |
| <b>Fig. S6.</b> (A) Product analysis in the EC reaction with the FTO electrode. (B) The selectivity of H <sub>2</sub> production from NH <sub>3</sub> . ....          | S5 |
| <b>Fig. S7.</b> PCA curves for the BiVO <sub>4</sub> /FTO and BiVO <sub>4</sub> /SnO <sub>2</sub> /FTO electrodes under illumination of simulated sunlight. ....      | S6 |
| <b>Fig. S8.</b> pH-dependence of the PEC properties of the BiVO <sub>4</sub> /FTO electrode. ....                                                                     | S6 |
| <b>Fig. S9.</b> NH <sub>3</sub> concentration-dependence of the PEC properties of the BiVO <sub>4</sub> /FTO electrode. ....                                          | S7 |
| <b>Fig. S10.</b> Long-term stability of the BiVO <sub>4</sub> /FTO electrode. ....                                                                                    | S7 |
| <b>Fig. S11.</b> Plots of width of the space charge layer ( <i>W</i> ) as a function of $\phi_{\text{scI}} - kT/q$ . ....                                             | S8 |
| <b>Fig. S12.</b> Effect of the BiVO <sub>4</sub> film thickness on the PEC properties. ....                                                                           | S8 |

## Materials

Fluorine-doped tin(IV) oxide film-coated glass (FTO, Aldrich TEC7, sheet resistance = 7  $\Omega$ /square) and Nafion film (Nafion 117, thickness = 0.007 inch) were purchased from Aldrich.  $\text{Bi}(\text{NO}_3)_3 \cdot 5\text{H}_2\text{O}$  (> 99.5%), acetic acid ( $\text{C}_2\text{H}_4\text{O}_2$ , > 99.7%),  $\text{VO}(\text{acac})_2$  (> 97.0%), acetylacetone (> 99.5%),  $\text{SnCl}_4 \cdot 5\text{H}_2\text{O}$  (> 98.0%), EtOH (> 99.5%),  $\text{Na}_2\text{SO}_4$  (> 99.0%), and ammonia solution (28.0-30.0%) were purchased from KANTO CHEMICAL CO., INC. All chemicals were used as received without further purification.

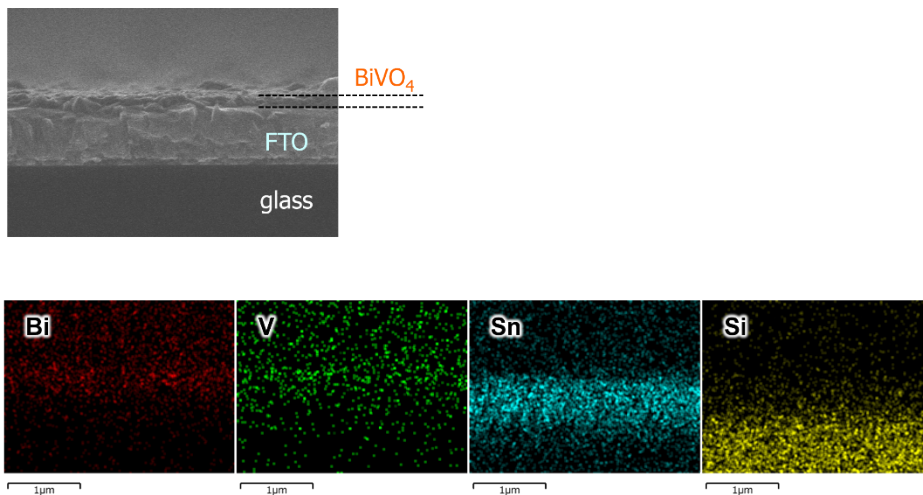

**Fig. S1.** SEM image (upper) and energy dispersive X-ray spectroscopy (EDS)-elemental mapping (lower) of the cross-section of BiVO<sub>4</sub>( *N* = 10)/FTO.

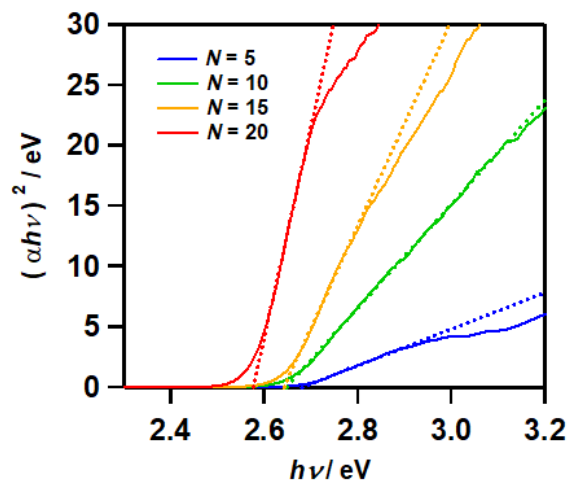

**Fig. S2.** Tauc plots for BiVO<sub>4</sub>/FTO samples prepared by repeating the spin coating *N* times.

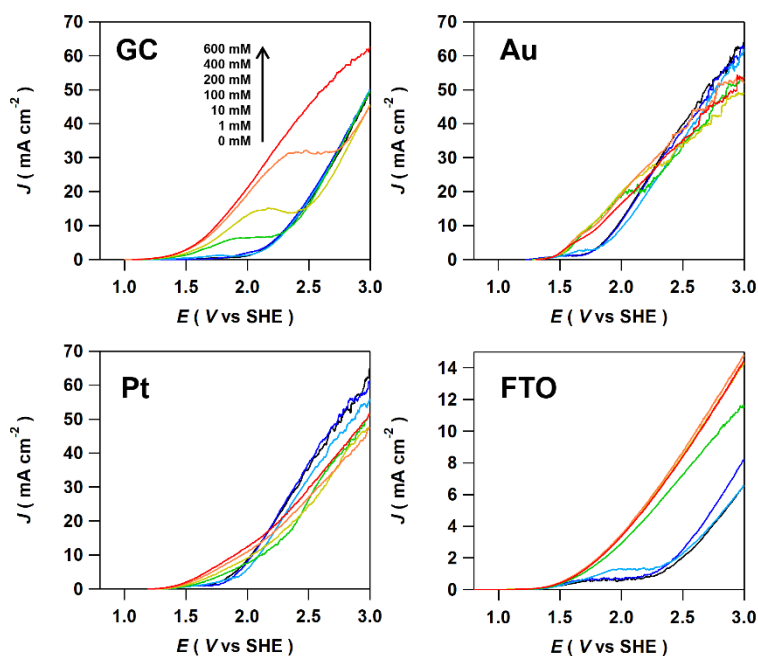

**Fig. S3.** Dark current-potential curves for several electrodes in deaerated 0.1 M Na<sub>2</sub>SO<sub>4</sub> aq. containing NH<sub>3</sub> with varying concentrations pH 11.

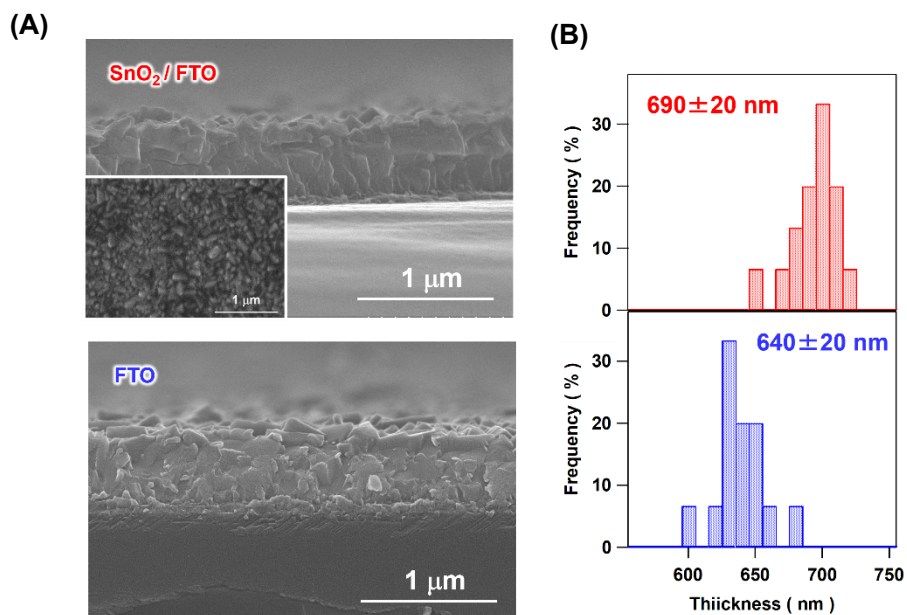

**Fig. S4.** (A) SEM images of the cross-sections of SnO<sub>2</sub>/FTO (upper) and FTO (lower). The inset shows the SEM image of the SnO<sub>2</sub>/FTO surface in the upper panel. (B) Film thickness distribution of SnO<sub>2</sub>/FTO (upper) and FTO (lower).

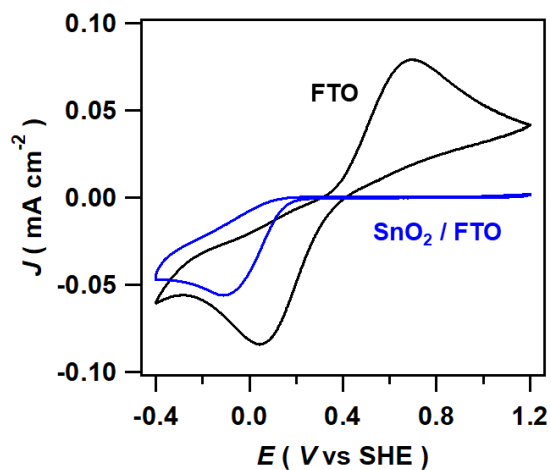

**Fig. S5.** CVs of FTO and SnO<sub>2</sub>/FTO electrodes in an aqueous electrolyte solution containing [Fe(CN)<sub>6</sub>]<sup>3-</sup>/Fe(CN)<sub>6</sub><sup>4-</sup> redox pairs.

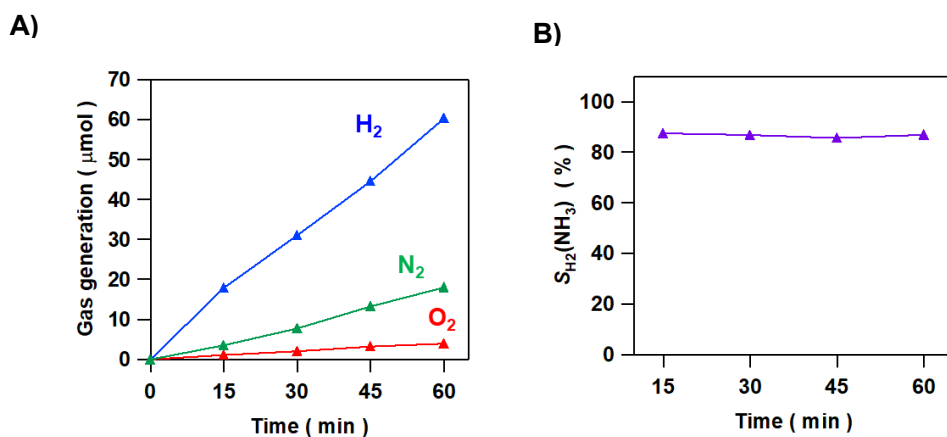

**Fig. S6.** (A) Product analysis in the EC reaction with the FTO electrode at  $E = +2.2$  V in 0.1 M Na<sub>2</sub>SO<sub>4</sub> electrolyte solution containing 0.59 M NH<sub>3</sub> (pH 11). (B) The selectivity of H<sub>2</sub> production from NH<sub>3</sub> ( $S_{H_2}(NH_3)$ ) as a function of reaction time.

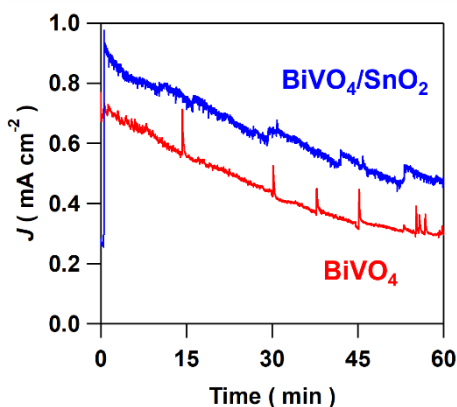

**Fig. S7.** PCA curves for the BiVO<sub>4</sub>/FTO and BiVO<sub>4</sub>/SnO<sub>2</sub>/FTO electrodes in 0.1 M Na<sub>2</sub>SO<sub>4</sub> electrolyte solution (pH 11) under illumination of visible light ( $\lambda > 430$  nm) in simulated sunlight (AM 1.5, 100 mW cm<sup>-2</sup>, one sun).

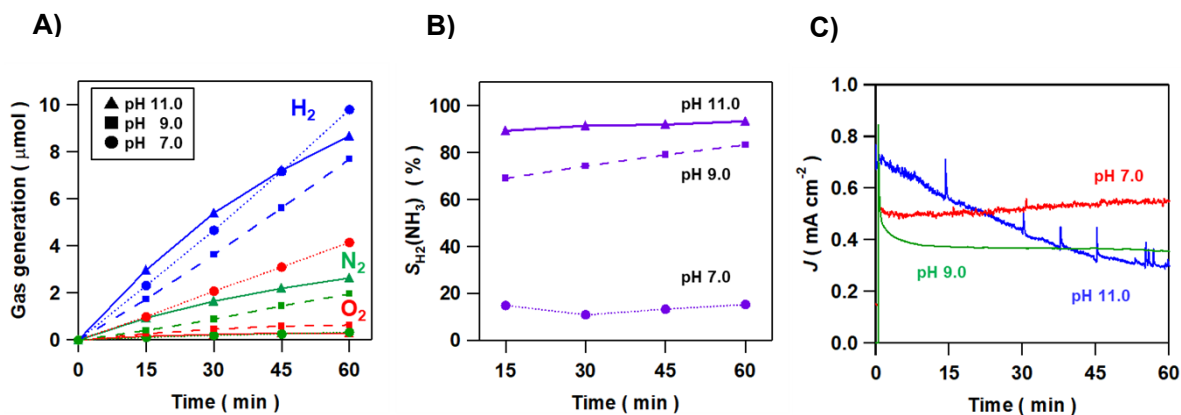

**Fig. S8.** pH-dependence of the PEC properties of the BiVO<sub>4</sub>/FTO electrode in 0.1 M Na<sub>2</sub>SO<sub>4</sub> electrolyte solution (pH 7, 9, 11) under illumination of visible light ( $\lambda > 430$  nm) in simulated sunlight (AM 1.5, 100 mW cm<sup>-2</sup>, one sun): (A) Product analysis (blue H<sub>2</sub>, green N<sub>2</sub>, red O<sub>2</sub>), (B) Selectivity of H<sub>2</sub> production from NH<sub>3</sub> ( $S_{H_2(NH_3)}$ ), (C) PCA curves.

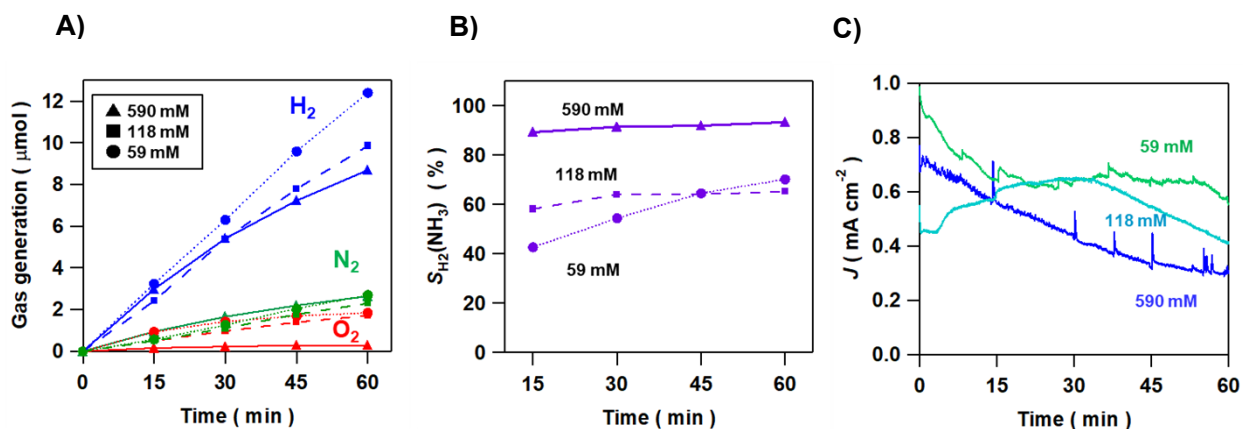

**Fig. S9.** NH<sub>3</sub> concentration-dependence of the PEC properties of the BiVO<sub>4</sub>/FTO electrode in 0.1 M Na<sub>2</sub>SO<sub>4</sub> electrolyte solution (pH 11) under illumination of visible light ( $\lambda > 430$  nm) in simulated sunlight (AM 1.5, 100 mW cm<sup>-2</sup>, one sun): (A) Product analysis (blue H<sub>2</sub>, green N<sub>2</sub>, red O<sub>2</sub>), (B) Selectivity of H<sub>2</sub> production from NH<sub>3</sub> (S<sub>H<sub>2</sub>(NH<sub>3</sub>)), (C) PCA curves.</sub>

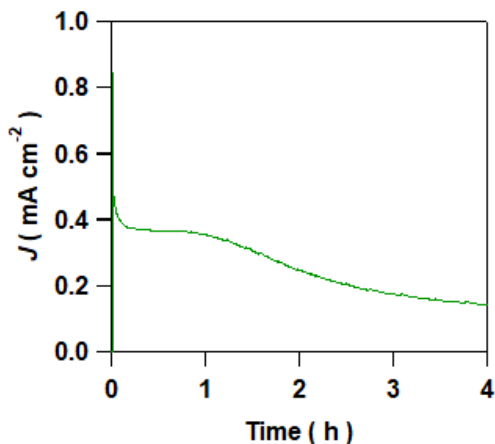

**Fig. S10.** Long-term stability of the BiVO<sub>4</sub>/FTO electrode. The PCA curve was measured in 0.1 M Na<sub>2</sub>SO<sub>4</sub> electrolyte solution containing 0.59 M NH<sub>3</sub> (pH 9) under illumination of visible light ( $\lambda > 430$  nm) in simulated sunlight (AM 1.5, 100 mW cm<sup>-2</sup>, one sun).

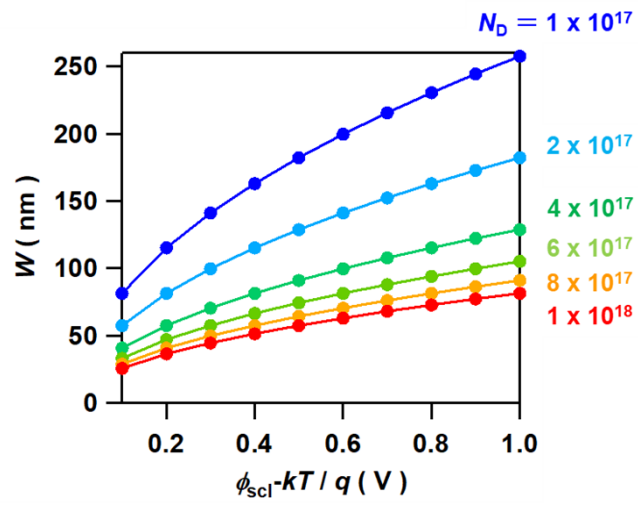

**Fig. S11.** Plots of width of the space charge layer ( $W$ ) as a function of  $\phi_{scl} - kT/q$ .



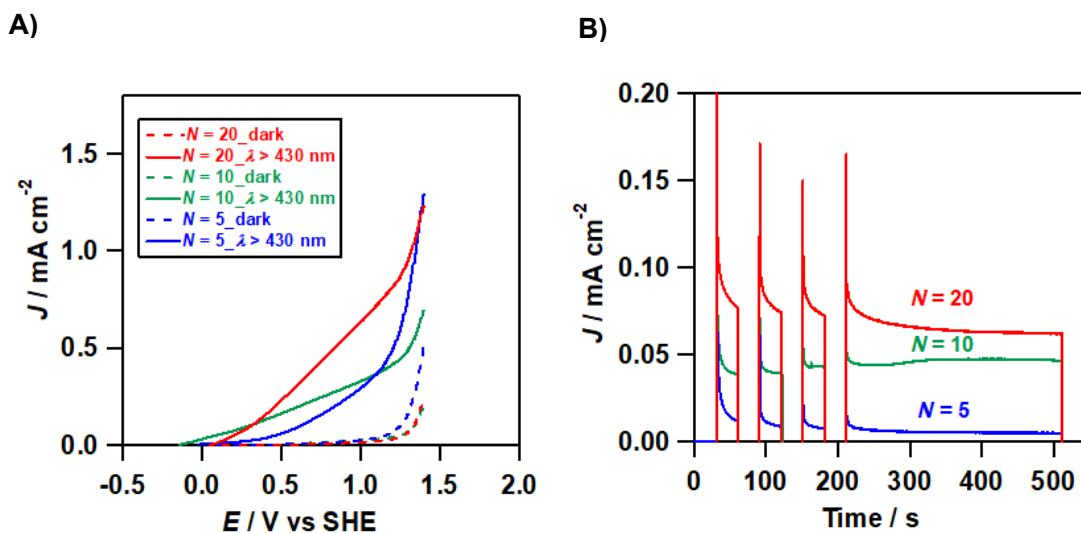

**Fig. S12.** (A)  $J$ - $E$  curves of BiVO<sub>4</sub>( $N = 5, 10, 20$ )/FTO with different BiVO<sub>4</sub> film thickness in 0.1 M Na<sub>2</sub>SO<sub>4</sub> electrolyte solution containing 0.59 M NH<sub>3</sub> (pH 11) under illumination of visible light ( $\lambda > 430$  nm) in the simulated sunlight (AM 1.5, 100 mW cm<sup>-2</sup>, one sun). (B) PCA curves of BiVO<sub>4</sub>( $N = 5, 10, 20$ )/FTO at the rest potential in the dark ( $E = +0.164$  V) under the same irradiation conditions.
